# Supplementary material for: Metabolic and Clinical Outcomes in Type 1 Diabetes in the COVID-19 Pre- and Post-Vaccination Periods in Spain: The COVID-SED1 Study
Source: MDPI journal article supplement (doi:10.3390/jcm13071922), 2024-03-26
Supplement: s1 [file s1]

**Supplementary Table S1. Baseline sociodemographic and clinical characteristics of the population without follow-up after the first SED1 study phase.**

|                                                 | <b>n</b> | <b>%</b>         |
|-------------------------------------------------|----------|------------------|
| Number of patients                              | 460      |                  |
| <i>Age (years)</i>                              |          |                  |
| mean $\pm$ SD                                   |          | 36.3 $\pm$ 14.0  |
| <i>Age Groups (Years)</i>                       |          |                  |
| 0-13                                            | 23       | 5.0              |
| 14-17                                           | 21       | 4.6              |
| 18-25                                           | 72       | 15.7             |
| 26-49                                           | 263      | 57.2             |
| > 49                                            | 81       | 17.6             |
| <i>Gender, women</i>                            | 250      | 54.4             |
| <i>Level of education</i>                       | 179      |                  |
| No studies                                      | 1        | 0.3              |
| Primary education                               | 71       | 16.3             |
| Secondary education                             | 164      | 37.8             |
| University studies or similar                   | 163      | 37.6             |
| Student                                         | 35       | 8.1              |
| <i>Weight (kg)</i>                              |          |                  |
| mean $\pm$ SD                                   |          | 69.2 $\pm$ 15.1  |
| <i>Height (cm)</i>                              |          |                  |
| mean $\pm$ SD                                   |          | 166.6 $\pm$ 10.5 |
| <i>BMI (kg/m<sup>2</sup>)</i>                   |          |                  |
| mean $\pm$ SD                                   |          | 24.8 $\pm$ 4.5   |
| <i>BMI grades (kg/m<sup>2</sup>)</i>            |          |                  |
| < 18,5                                          | 17       | 3.7              |
| 18,5-24,9                                       | 259      | 56.7             |
| 25-26,9                                         | 67       | 14.7             |
| 27-29,9                                         | 60       | 13.1             |
| $\geq$ 30                                       | 54       | 11.8             |
| <i>Time since diagnosis of T1DM (years)</i>     |          |                  |
| mean $\pm$ SD                                   |          | 17.3 $\pm$ 11.7  |
| <i>Method of Insulin Administration</i>         |          |                  |
| Basal-bolus                                     | 357      | 77.6             |
| Premixed insulins                               | 5        | 1.1              |
| Continuous subcutaneous insulin infusion (CSII) | 90       | 19.6             |
